# Supplementary material
Source: MDPI journal article supplement (https://www.mdpi.com/2072-4292/11/13/1618)
Supplement: s1 [file s1]

## Supplementary Material

### S1. Calibration of the WOFOST model

Table S1. Values of soil parameters for WOFOST model

| Parameter | Description                                            | Units                            | Value |
|-----------|--------------------------------------------------------|----------------------------------|-------|
| SMW       | soil moisture content at wilting point                 | cm <sup>3</sup> /cm <sup>3</sup> | 0.072 |
| SM0       | soil moisture content of saturated soil                | cm <sup>3</sup> /cm <sup>3</sup> | 0.426 |
| SMFCF     | soil moisture content at field capacity                | cm <sup>3</sup> /cm <sup>3</sup> | 0.283 |
| CRAIRC    | critical soil air content for aeration                 | cm <sup>3</sup> /cm <sup>3</sup> | 0.06  |
| SSI       | initial surface storage of water                       | cm                               | 0     |
| SMLIM     | maximum moisture content in topsoil                    | cm                               | 0.04  |
| WAV       | initial available water in total root-exploitable soil | cm                               | 20    |
| K0        | hydraulic conductivity of saturated soil               | cm/day                           | 10    |
| SOPE      | maximum percolation rate in the root zone              | cm/day                           | 10    |
| KSUB      | maximum percolation rate of water into subsoil         | cm/day                           | 10    |

Table S2. Values of crop parameters for WOFOST model

| Parameter                  | Description                                                | Units                       | Value   |
|----------------------------|------------------------------------------------------------|-----------------------------|---------|
| <b>*Phenology*</b>         |                                                            |                             |         |
| DLO                        | optimum day length for development                         | h                           | 14      |
| DLC                        | critical day length                                        | h                           | 8       |
| TSUM1                      | cumulative temperature from emergence to anthesis          | °C                          | 981.0   |
| TSUM2                      | cumulative temperature from anthesis to maturity           | °C                          | 785.1   |
| <b>*Initial condition*</b> |                                                            |                             |         |
| TDWI                       | initial total crop dry weight                              | kg/ha                       | 210     |
| LAIEM                      | leaf area index at emergence                               | ha/ha                       | 0.13    |
| RGRLAI                     | maximum relative rate of increase in LAI                   | ha/ha/day                   | 0.00817 |
| <b>*Green area*</b>        |                                                            |                             |         |
| SLATB000                   | specific leaf area at DVS = 0                              | ha/kg                       | 0.00202 |
| SLATB070                   | specific leaf area at DVS = 0.7                            | ha/kg                       | 0.00261 |
| SLATB160                   | specific leaf area at DVS = 1.6                            | ha/kg                       | 0.00185 |
| SLATB200                   | specific leaf area at DVS = 2                              | ha/kg                       | 0.00185 |
| SPAN                       | life span of leaves growing at 35 °C                       | days                        | 27      |
| TBASE                      | lower threshold temperature for aging of leaves            | °C                          | 0       |
| <b>*Assimilation*</b>      |                                                            |                             |         |
| KDIFTB000                  | extinction coefficient for diffuse visible light(DVS = 0)  | -                           | 0.6     |
| KDIFTB200                  | extinction coefficient for diffuse visible light(DVS = 2)  | -                           | 0.6     |
| EFFTB00                    | light-use efficiency of a single leaf (T = 0 °C)           | kg/ha/h/J·m <sup>2</sup> ·s | 0.45    |
| EFFTB40                    | light-use efficiency of a single leaf (T = 40 °C)          | kg/ha/h/J·m <sup>2</sup> ·s | 0.45    |
| AMAXTB000                  | maximum leaf CO <sub>2</sub> assimilation rate (DVS = 0)   | kg/ha/h                     | 45      |
| AMAXTB100                  | maximum leaf CO <sub>2</sub> assimilation rate (DVS = 1)   | kg/ha/h                     | 45      |
| AMAXTB130                  | maximum leaf CO <sub>2</sub> assimilation rate (DVS = 1.3) | kg/ha/h                     | 45      |
| AMAXTB200                  | maximum leaf CO <sub>2</sub> assimilation rate (DVS = 2)   | kg/ha/h                     | 4.8     |
| TMPFTB00                   | reduction factor of AMAX (T = 0°C)                         | -                           | 0.01    |
| TMPFTB10                   | reduction factor of AMAX (T = 10°C)                        | -                           | 0.60    |

|                                          |                                                           |                           |       |
|------------------------------------------|-----------------------------------------------------------|---------------------------|-------|
| TMPFTB15                                 | reduction factor of AMAX (T = 15°C)                       | -                         | 0.85  |
| TMPFTB25                                 | reduction factor of AMAX (T = 25°C)                       | -                         | 1     |
| TMPFTB35                                 | reduction factor of AMAX (T = 35°C)                       | -                         | 0.85  |
| TMPFTB45                                 | reduction factor of AMAX (T = 45°C)                       | -                         | 0     |
| *Conversion of assimilated into biomass* |                                                           |                           |       |
| CVL                                      | efficiency of conversion into leaves                      | kg/kg                     | 0.740 |
| CVO                                      | efficiency of conversion into storage                     | kg/kg                     | 0.809 |
| CVR                                      | efficiency of conversion into roots                       | kg/kg                     | 0.694 |
| CVS                                      | efficiency of conversion into stems                       | kg/kg                     | 0.762 |
| *Maintenance respiration*                |                                                           |                           |       |
| Q10                                      | relative change in respiration rate per 10 °C increase    | -                         | 2     |
| RML                                      | relative maintenance respiration rate of leaves           | kg CH <sub>2</sub> O/kg/d | 0.030 |
| RMO                                      | relative maintenance respiration rate of storage          | kg CH <sub>2</sub> O/kg/d | 0.010 |
| RMR                                      | relative maintenance respiration rate of roots            | kg CH <sub>2</sub> O/kg/d | 0.015 |
| RMS                                      | relative maintenance respiration rate of stems            | kg CH <sub>2</sub> O/kg/d | 0.015 |
| *Partitioning*                           |                                                           |                           |       |
| FRTB000                                  | fraction of total dry matter to roots at DVS = 0          | kg/kg                     | 0.50  |
| FRTB040                                  | fraction of total dry matter to roots at DVS = 0.40       | kg/kg                     | 0.17  |
| FRTB070                                  | fraction of total dry matter to roots at DVS = 0.70       | kg/kg                     | 0.07  |
| FRTB090                                  | fraction of total dry matter to roots at DVS = 0.90       | kg/kg                     | 0.03  |
| FRTB120                                  | fraction of total dry matter to roots at DVS = 1.20       | kg/kg                     | 0     |
| FRTB200                                  | fraction of total dry matter to roots at DVS = 2          | kg/kg                     | 0     |
| FLTB000                                  | fraction of total dry matter to leaves at DVS = 0         | kg/kg                     | 0.682 |
| FLTB015                                  | fraction of total dry matter to leaves at DVS = 0.15      | kg/kg                     | 0.560 |
| FLTB025                                  | fraction of total dry matter to leaves at DVS = 0.25      | kg/kg                     | 0.623 |
| FLTB050                                  | fraction of total dry matter to leaves at DVS = 0.50      | kg/kg                     | 0.310 |
| FLTB065                                  | fraction of total dry matter to leaves at DVS = 0.65      | kg/kg                     | 0.220 |
| FLTB095                                  | fraction of total dry matter to leaves at DVS = 0.95      | kg/kg                     | 0     |
| FLTB200                                  | fraction of total dry matter to leaves at DVS = 2         | kg/kg                     | 0     |
| FSTB000                                  | fraction of total dry matter to stems at DVS = 0          | kg/kg                     | 0.318 |
| FSTB015                                  | fraction of total dry matter to stems at DVS = 0.15       | kg/kg                     | 0.450 |
| FSTB025                                  | fraction of total dry matter to stems at DVS = 0.25       | kg/kg                     | 0.377 |
| FSTB050                                  | fraction of total dry matter to stems at DVS = 0.50       | kg/kg                     | 0.690 |
| FSTB065                                  | fraction of total dry matter to stems at DVS = 0.65       | kg/kg                     | 0.780 |
| FSTB095                                  | fraction of total dry matter to stems at DVS = 0.95       | kg/kg                     | 0.270 |
| FSTB200                                  | fraction of total dry matter to stems at DVS = 2          | kg/kg                     | 0     |
| FOTB000                                  | fraction of total dry matter to storage at DVS = 0        | kg/kg                     | 0     |
| FOTB095                                  | fraction of total dry matter to storage at DVS = 0.95     | kg/kg                     | 0.73  |
| FOTB200                                  | fraction of total dry matter to storage at DVS = 2        | kg/kg                     | 1     |
| *Death rates*                            |                                                           |                           |       |
| PERDL                                    | maximum relative death rate of leaves due to water stress | kg/kg/d                   | 0.03  |
| RDRRTB000                                | relative death rate of roots at DVS = 0                   | kg/kg/d                   | 0     |
| RDRRTB150                                | relative death rate of roots at DVS = 1.50                | kg/kg/d                   | 0     |

|             |                                              |         |      |
|-------------|----------------------------------------------|---------|------|
| RDRRTB151   | relative death rate of roots at DVS = 1.5001 | kg/kg/d | 0.02 |
| RDRRTB200   | relative death rate of roots at DVS = 2      | kg/kg/d | 0.02 |
| RDRSTB000   | relative death rate of stems at DVS = 0      | kg/kg/d | 0    |
| RDRSTB150   | relative death rate of stems at DVS = 1.50   | kg/kg/d | 0    |
| RDRSTB151   | relative death rate of stems at DVS = 1.5001 | kg/kg/d | 0.02 |
| RDRSTB200   | relative death rate of stems at DVS = 2      | kg/kg/d | 0.02 |
| *Water use* |                                              |         |      |
| CFET        | correction factor transpiration rate         | -       | 1.0  |
| DEPNR       | crop group number for soil water depletion   | -       | 4.5  |
| IAIRDU      | air ducts in roots                           | -       | 0    |
| *Rooting*   |                                              |         |      |
| RDI         | initial rooting depth                        | cm      | 10   |
| RRI         | maximum daily increase in rooting depth      | cm/d    | 1.2  |
| RDMCR       | maximum rooting depth                        | cm      | 125  |

---
